# Supplementary material for: Pressure-induced metallization and electronic transition in a two-dimensional ferroelastic semiconductor of Nb 2 SiTe 4 in different hydrostatic environments
Source: Royal Society of Chemistry journal article supplement (doi:10.1039/d5dt02937f), 2025-12-12
Supplement: d5dt02937f1.pdf [file d5dt02937f1.pdf]

## Supplementary Information

### **Pressure-induced metallization and electronic transition in two-dimensional ferroelastic semiconductor of Nb<sub>2</sub>SiTe<sub>4</sub> under different hydrostatic environments**

Xinyu Zhang,<sup>a,b</sup> Lidong Dai,<sup>\*c</sup> Haiying Hu,<sup>c</sup> Meiling Hong,<sup>a,b</sup> Bing Lv,<sup>c</sup> Xuefei Liu,<sup>c</sup>

Juxiang Shao,<sup>a,b</sup> Ming Yang,<sup>b</sup> Shiwei Xie,<sup>b</sup> Hongchun Luo,<sup>a,b</sup> Yu Gao,<sup>a,b</sup> Tao Wang,<sup>a,b</sup>

Miao Ren<sup>a,b</sup> and Haonan Cheng<sup>b</sup>

#### **AFFILIATIONS**

<sup>a</sup>Key Laboratory of Computational Physics of Sichuan Province, College of Mathematics and Physics, Yibin University, Yibin 644007, China;

<sup>b</sup>College of Mathematics and Physics, Yibin University, Yibin 644007, China;

<sup>c</sup>School of Physics and Electronic Science, Guizhou Normal University, Guiyang, 550025, China

<sup>\*</sup>Author to whom correspondence should be addressed: [dailidong@gznu.edu.cn](mailto:dailidong@gznu.edu.cn)

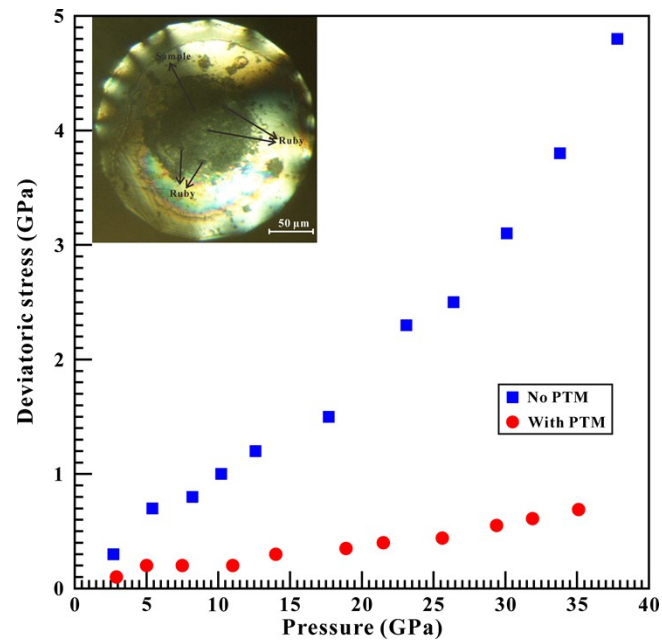

**Fig. S1** The relationship between deviatoric stress and pressure under different hydrostatic environments. Inset: the optical image of the sample chamber in a diamond anvil cell. Herein, the signal of PTM stands for pressure transmitting medium.

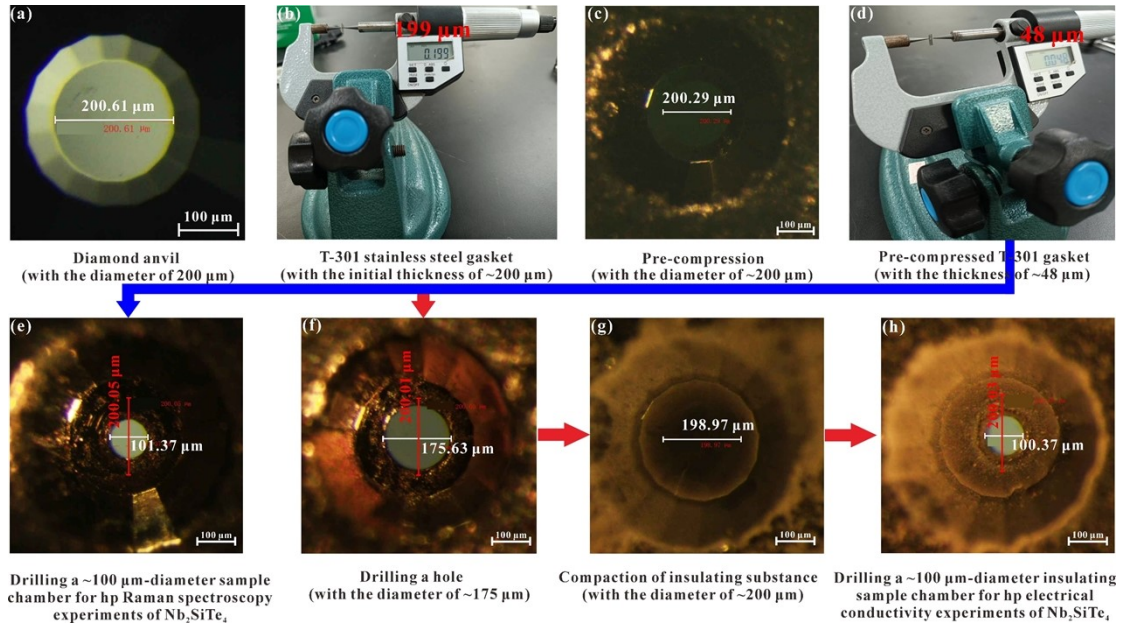

**Fig. S2** The detailed procedures on the high-pressure Raman spectroscopy and electrical conductivity experiments of  $\text{Nb}_2\text{SiTe}_4$ . Herein, the symbol of ph denotes high pressure.

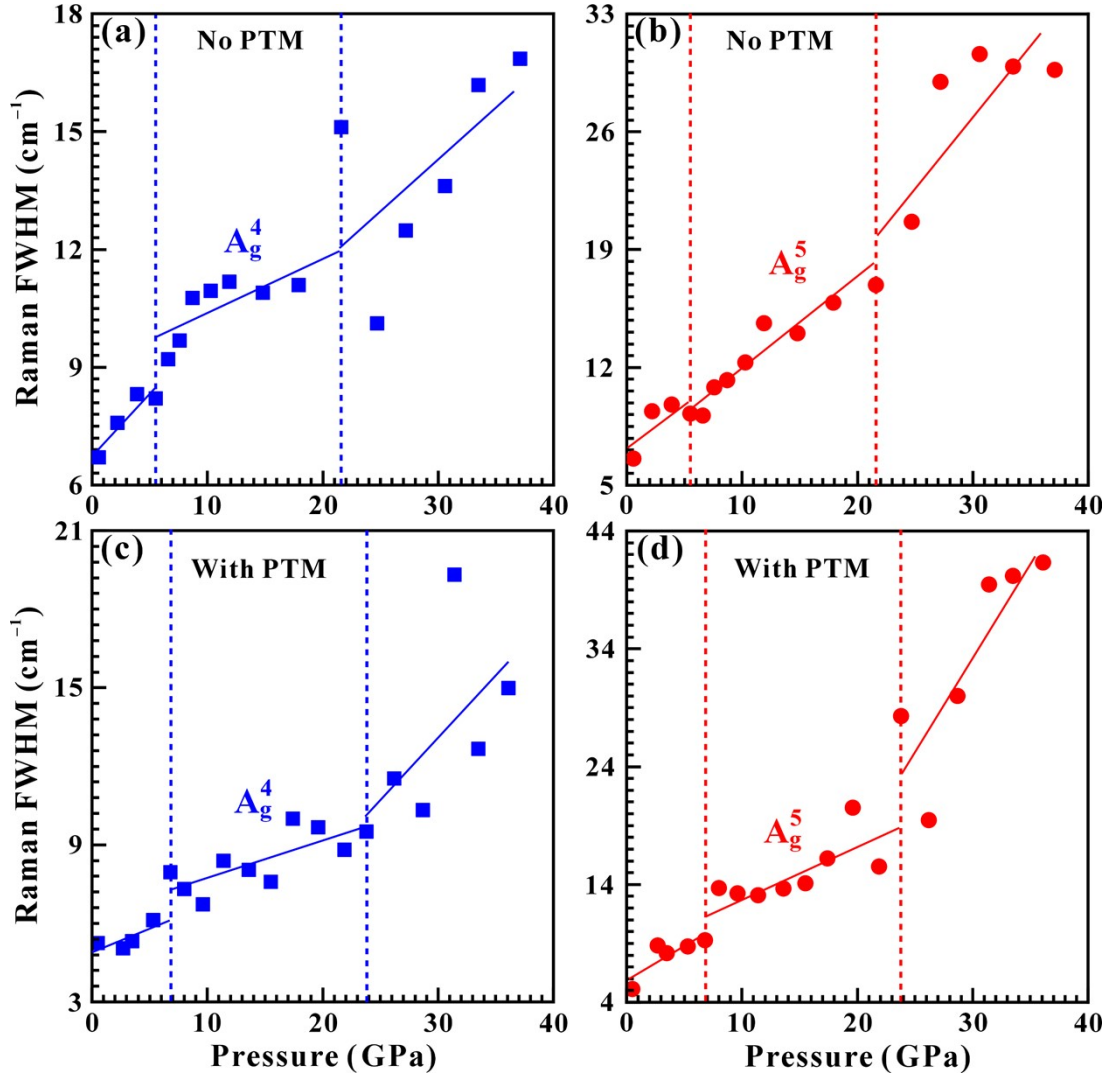

**Fig. S3** The evolution of Raman FWHM as a function of pressure for (a)  $A_g^4$  mode and (b)  $A_g^5$  mode under non-hydrostatic condition as well as (c)  $A_g^4$  mode and (d)  $A_g^5$  mode under hydrostatic condition, respectively. Herein, the signal of PTM signifies pressure transmitting medium. The errors in Raman FWHMs are within the size of the symbols. The colored solid and dashed lines are visual guides.

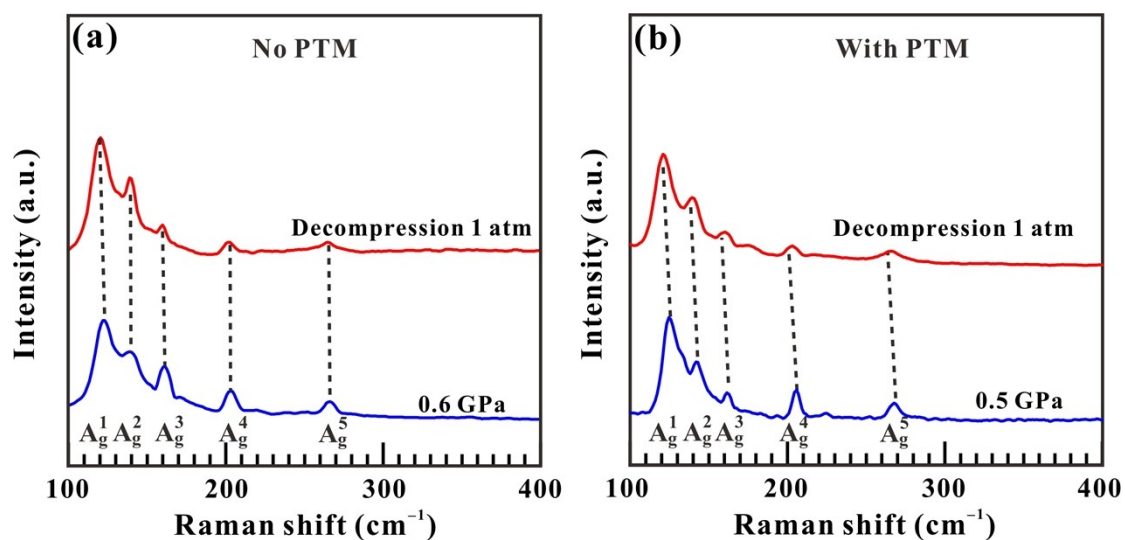

**Fig. S4** The comparison of Raman spectra for the starting and recovered samples under (a) non-hydrostatic condition and (b) hydrostatic condition, respectively. Herein, the signal of PTM denotes pressure transmitting medium. The black dashed lines are used to guide to the eyes.

**Table S1** Pressure-dependent Raman FWHMs ( $dF/dP$ ,  $\text{cm}^{-1} \text{ GPa}^{-1}$ ) of  $\text{Nb}_2\text{SiTe}_4$  upon compression under different hydrostatic environments. Herein,  $F$  ( $\text{cm}^{-1}$ ) and  $P$  (GPa) represent Raman FWHM and pressure, respectively.

| Pressure condition | Pressure range (GPa) | $A_g^4$ | $A_g^5$ |
|--------------------|----------------------|---------|---------|
| Non-hydrostatic    | 0.6–3.9              | 0.32    | 0.51    |
|                    | 5.5–17.9             | 0.14    | 0.55    |
|                    | 21.6–37.1            | 0.26    | 0.85    |
| Hydrostatic        | 0.5–5.3              | 0.18    | 0.74    |
|                    | 6.8–21.9             | 0.14    | 0.44    |
|                    | 23.8–36.1            | 0.48    | 1.60    |

**Table S2** The detailed values of the cross-sectional area of electrodes ( $S$ ) and the distance between electrodes ( $L$ ) at five representative pressure points of 0, 5.4, 9.5, 14.1 and 17.0 GPa.

| Pressure (GPa) | $L$ (cm) | $S$ (cm <sup>2</sup> ) |
|----------------|----------|------------------------|
| 0              | 0.0050   | 0.00011217             |
| 5.4            | 0.0048   | 0.00009059             |
| 9.5            | 0.0046   | 0.00006998             |
| 14.1           | 0.0043   | 0.00006011             |
| 17.0           | 0.0041   | 0.00005422             |
